# Supplementary material
Source: Frontiers journal article supplement (https://www.frontiersin.org/articles/259993)
Supplement: Data_Sheet_1.PDF [file Data_Sheet_1.PDF]

## Supplementary Materials

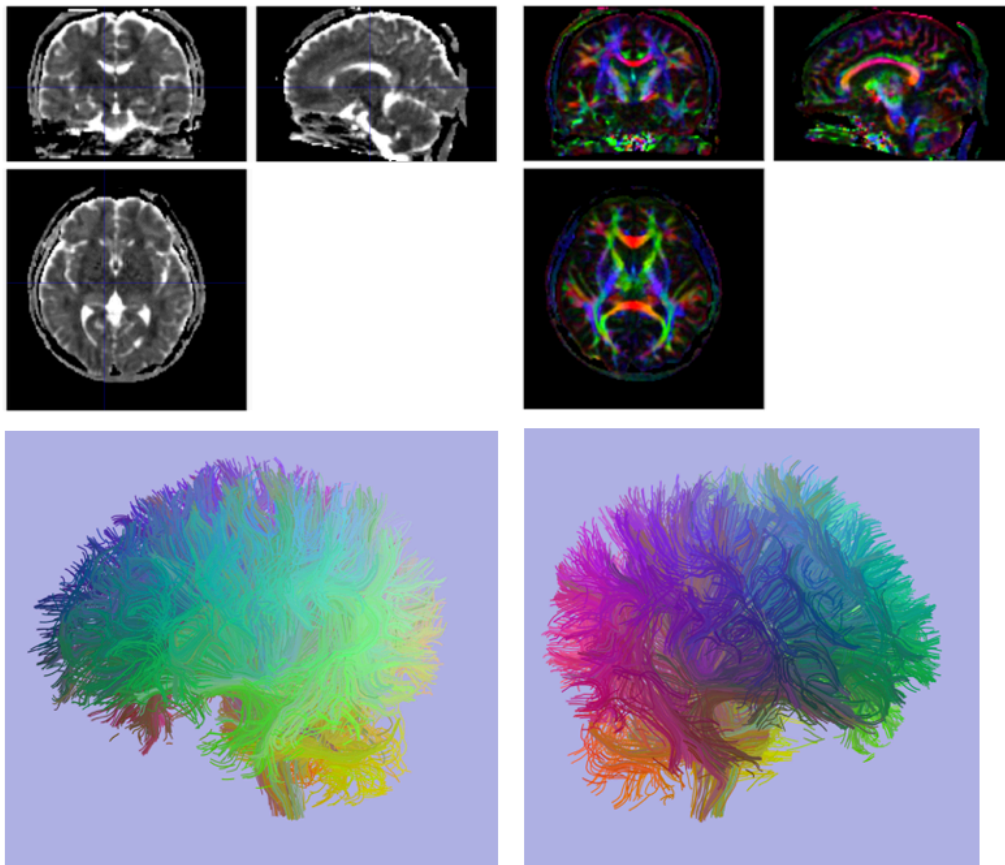

**Figure S1. A DTI example of a subject.** Coronal, sagittal and axial slices of a DWI volume (left top panel), a map of primary eigenvectors of DTI (colored in red, green and blue according to vector elements, right top panel), a whole brain fiber tractography (bottom panels). All images were constructed using DoDTI (Yonsei University, <http://neuroimage.yonsei.ac.kr/dodti>).

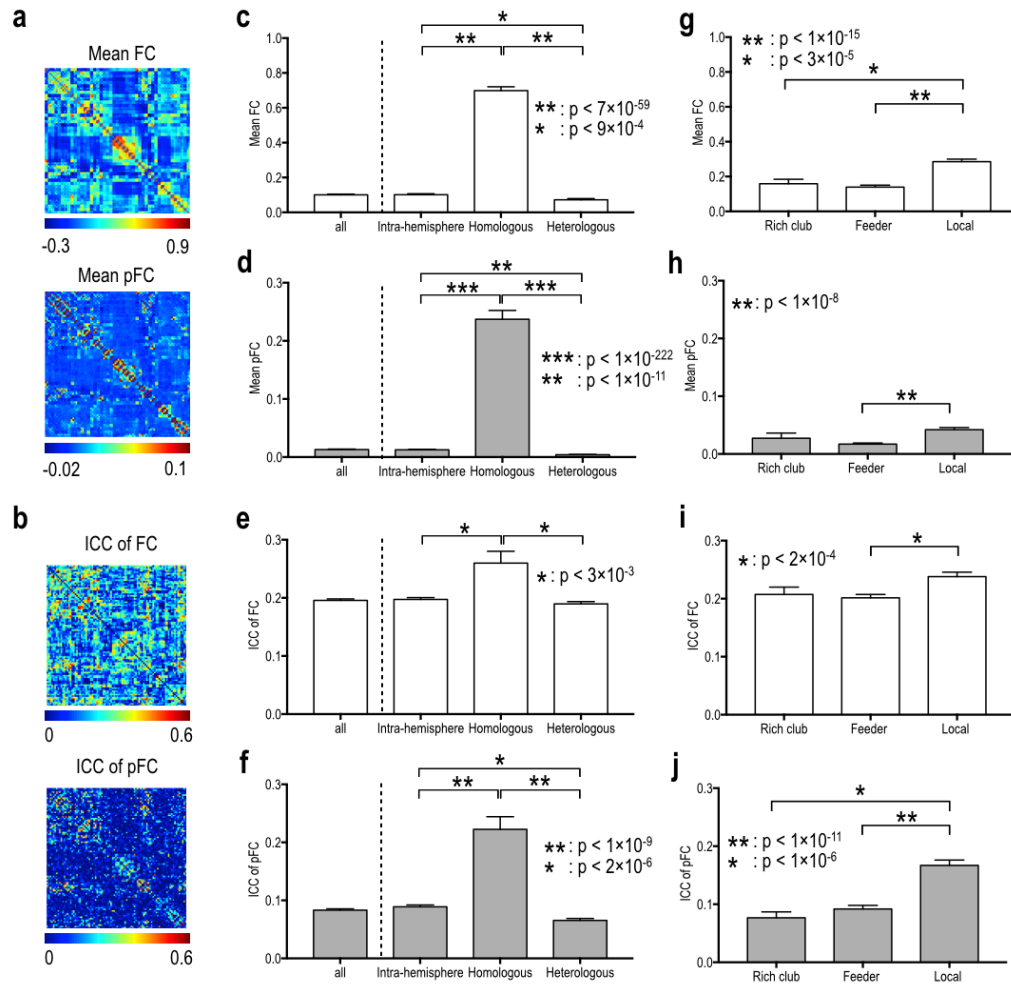

**Figure S2. Mean functional connectivity strength and its stability according to edge types after global signal regression.** Spatial patterns of mean functional connectivity (a) and of functional connectivity stability (i.e., ICC) (b). Mean and ICC of FC and pFC according to the inter- and intra-hemispheric edge types (c-f) and according to topological edge types in rich-club organization (g-j). FC: Pearson correlation-based functional connectivity, pFC: partial correlation-based functional connectivity.

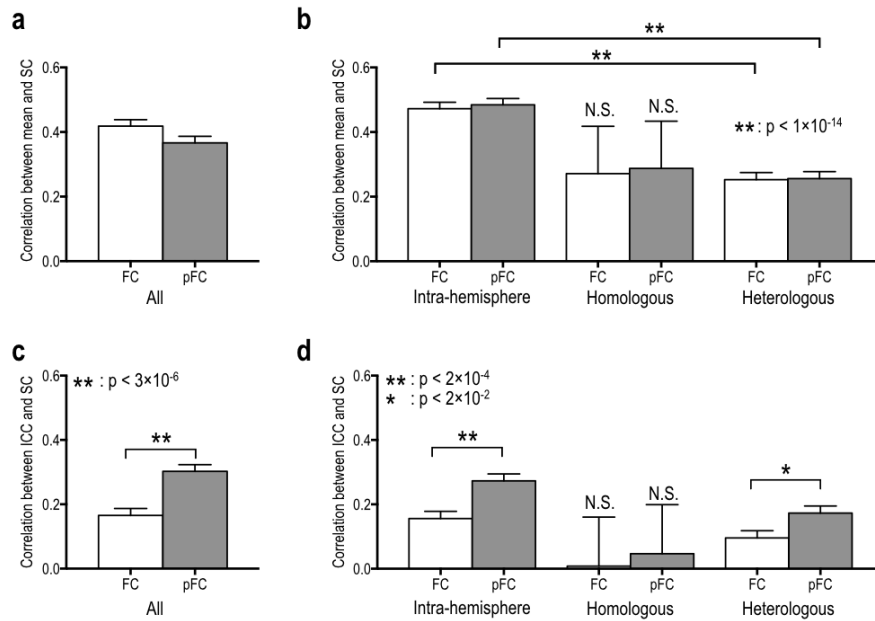

**Figure S3. Relationships between the stability of functional connectivity and structural connectivity according to edge types after global signal regression.** The relationships between functional connectivity strength and structural connectivity (SC, defined by log-transformed fiber counts) for whole brain edges (a) and for intra-hemispheric edges and for inter-hemispheric homologous/heterologous edges (b). The relationships between intra-class correlations (ICCs, stability) of functional connectivity and log-transformed fiber counts in the different edge types (c)-(d). FC: Pearson correlation-based functional connectivity, pFC: partial correlation-based functional connectivity. N.S. represents “no significant difference.”

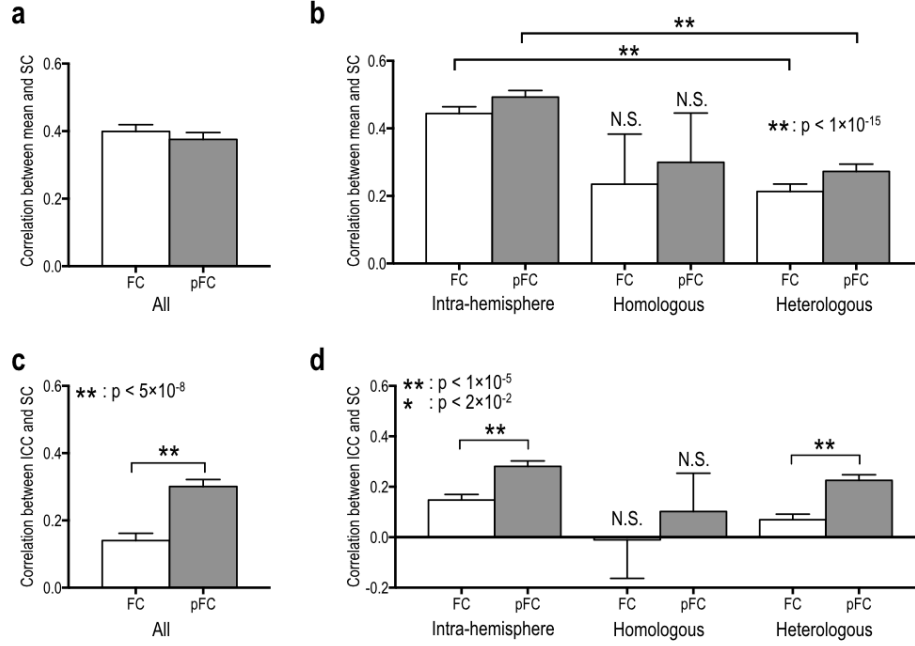

**Figure S4. Relationships between the stability of functional connectivity and structural connectivity according to edge types using normalized fiber counts.** The relationships between functional connectivity strength and structural connectivity (SC, defined by log-transformed fiber counts) for whole brain edges (a) and for intra-hemispheric edges and for inter-hemispheric homologous/heterologous edges (b). The relationships between intra-class correlations (ICCs, stability) of functional connectivity and log-transformed fiber counts in the different edge types (c)-(d). FC: Pearson correlation-based functional connectivity, pFC: partial correlation-based functional connectivity. N.S. represents “no significant difference.”

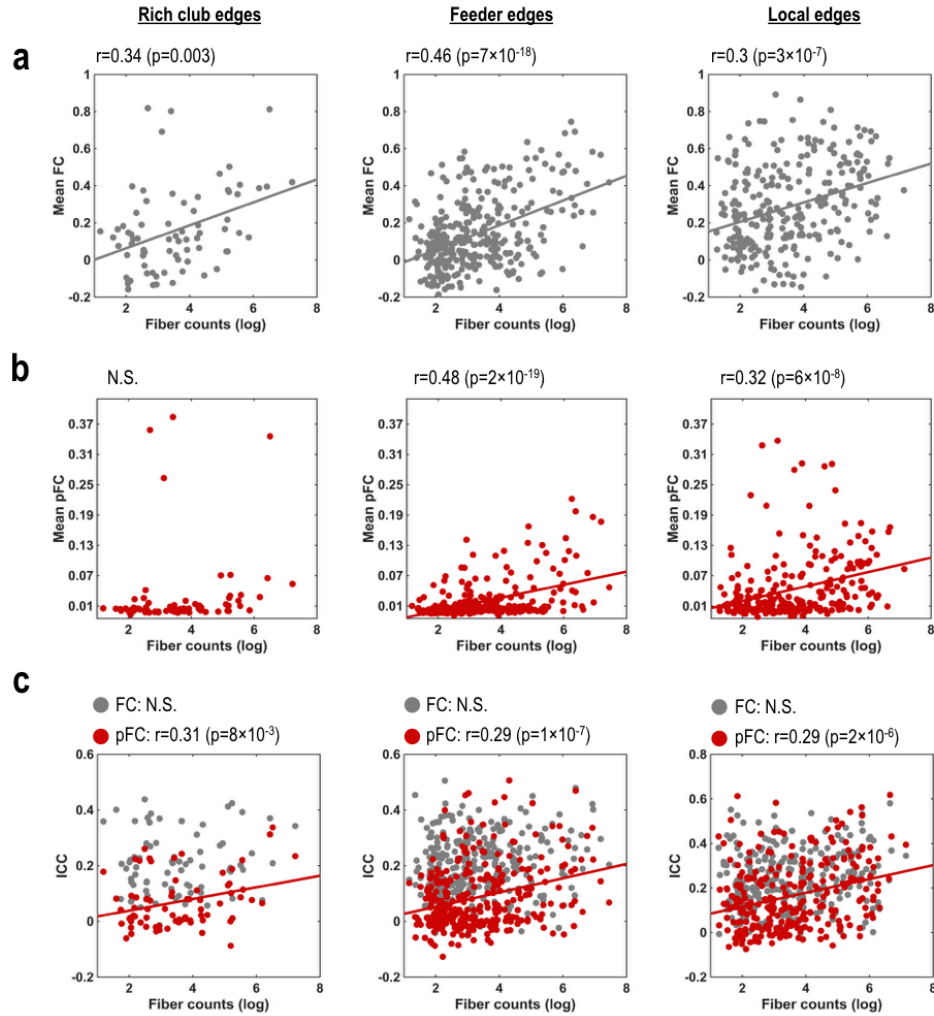

**Figure S5. Relationships between stability of functional connectivity and structural connectivity according to topological edge types in rich club organization after global signal regression.** (a) Relationships between strength of FC and log-transformed fiber counts in rich club, feeder, and local edges for FC. (b) Relationships between strength of pFC and log-transformed fiber counts in rich club, feeder, and local edges for FC. (c) Relationships between stability (ICC) and strength of FC (gray circles lines) and pFC (red circles and regression lines) and log-transformed fiber counts in rich club, feeder, and local edges. N.S. indicates no significance.

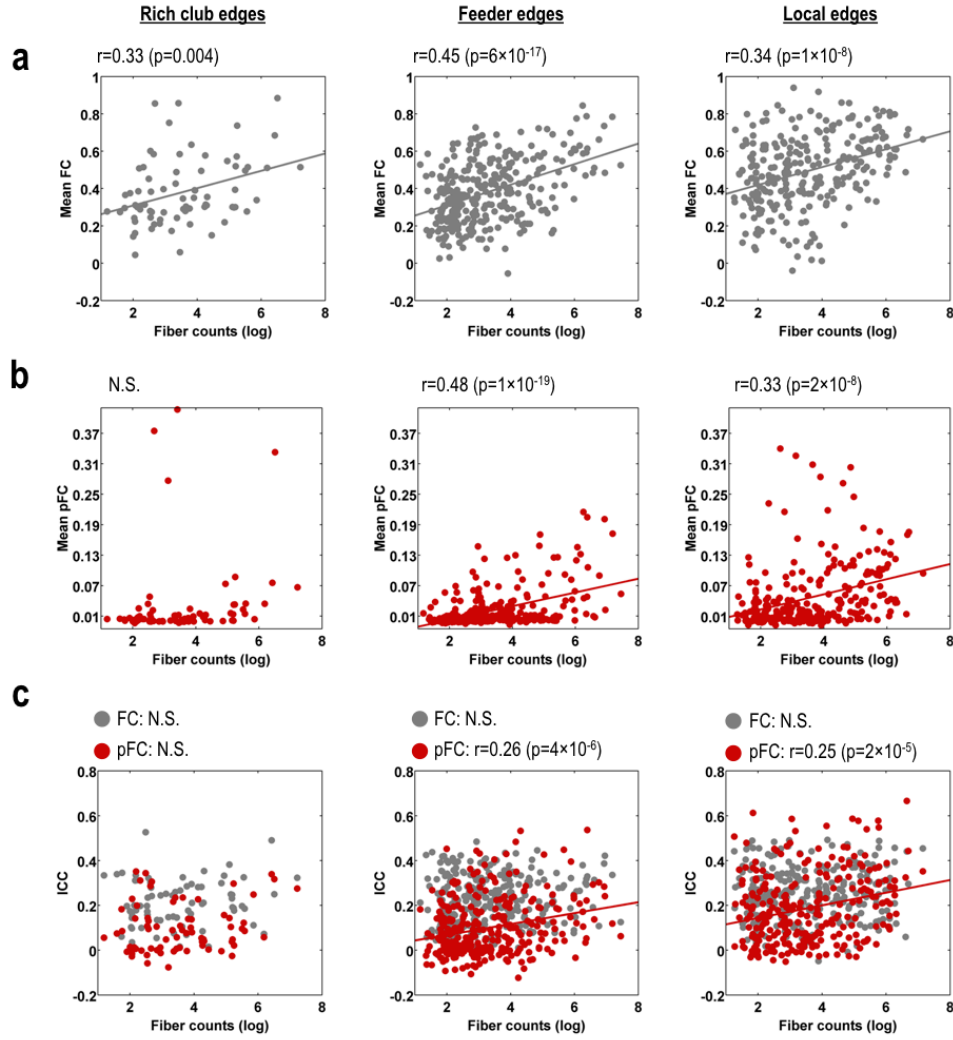

**Figure S6. Relationships between stability of functional connectivity and structural connectivity according to topological edge types in rich club organization using normalized fiber counts.** (a) Relationships between strength of FC and log-transformed fiber counts in rich club, feeder, and local edges for FC. (b) Relationships between strength of pFC and log-transformed fiber counts in rich club, feeder, and local edges for FC. (c) Relationships between stability (ICC) and strength of FC (gray circles lines) and pFC (red circles and regression lines) and log-transformed fiber counts in rich club, feeder, and local edges. N.S. indicates no significance.

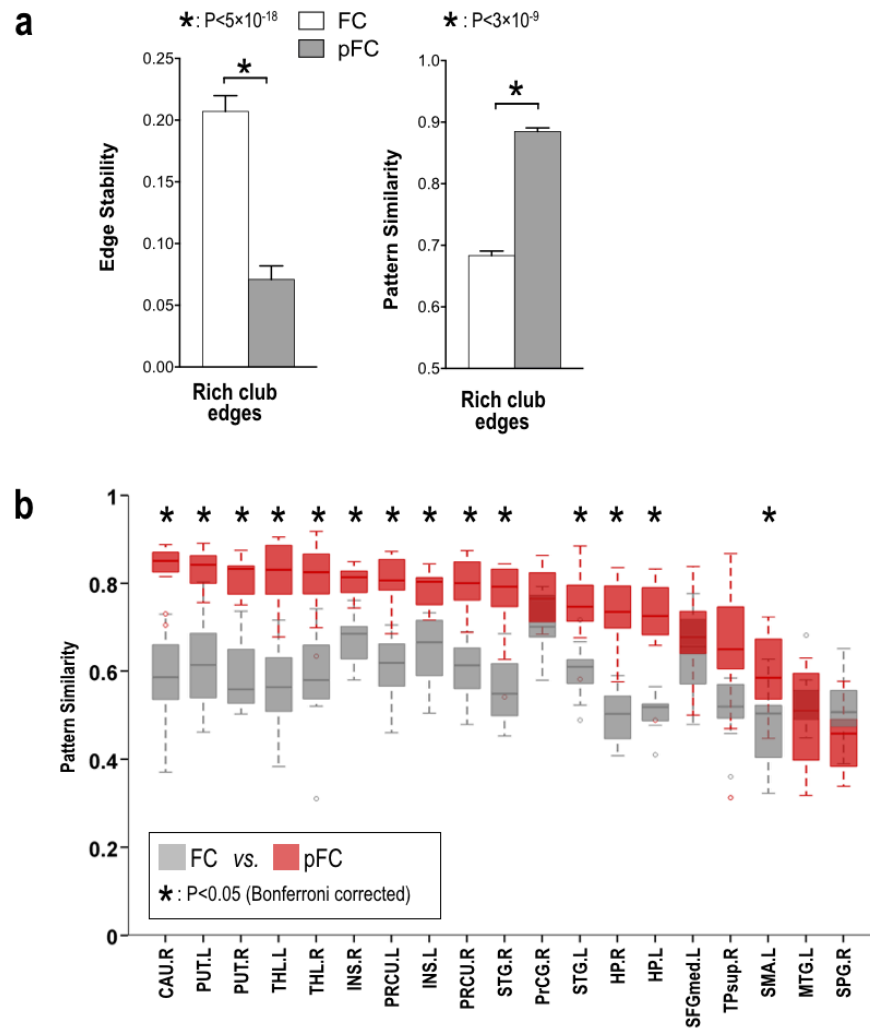

**Figure S7. Stability of multivariate edge involvement patterns for rich club and feeder edges after global signal regression.** (a) Univariate edge stability (mean ICC) of functional connectivity and temporal similarity of multivariate edge involvement patterns for rich club edges. (c) Stability of feeder edge involvement patterns for a subnetwork of each rich club node, where star (\*) indicates significant difference between pattern stability in FC and stability in pFC. Abbreviations: THL, thalamus; PUT, putamen; PRCU, precuneus; HP, hippocampus; STG, superior temporal gyrus; SPG, superior parietal gyrus; L, left; R, right.

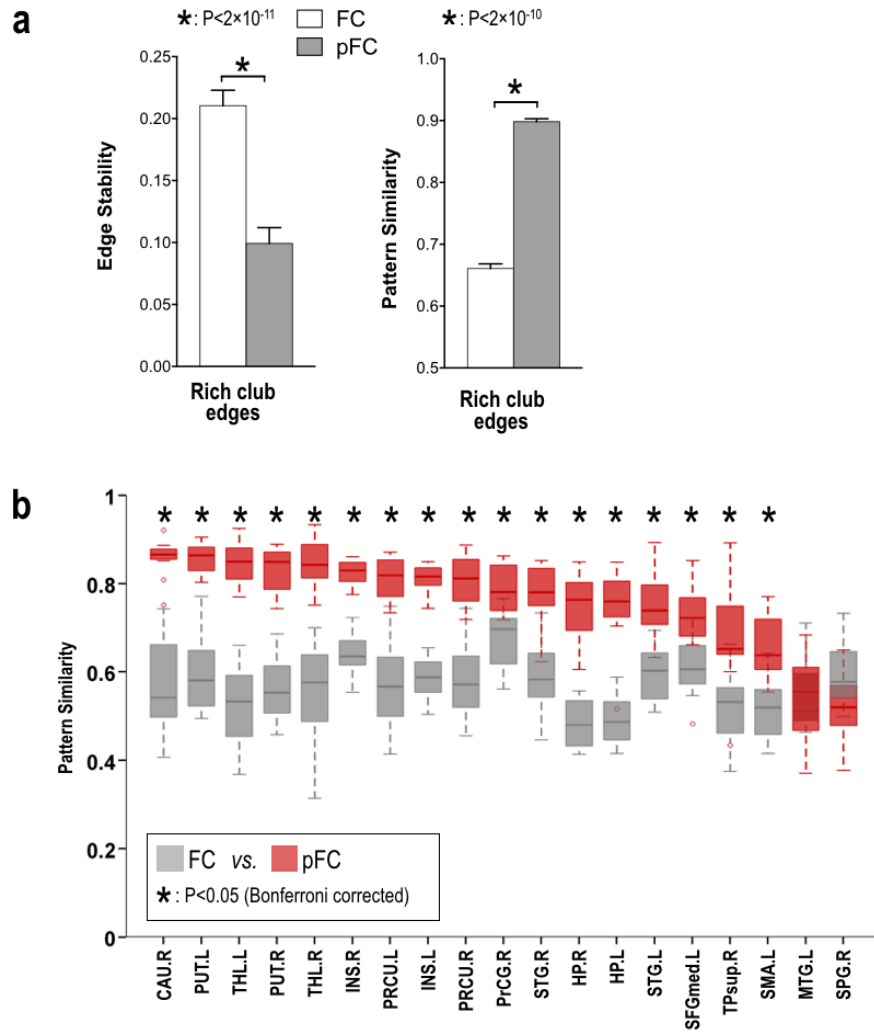

**Figure S8. Stability of multivariate edge involvement patterns for rich club and feeder edges using normalized fiber counts.** (a) Univariate edge stability (mean ICC) of functional connectivity and temporal similarity of multivariate edge involvement patterns for rich club edges. (c) Stability of feeder edge involvement patterns for a subnetwork of each rich club node, where star (\*) indicates significant difference between pattern stability in FC and stability in pFC. Abbreviations: THL, thalamus; PUT, putamen; PRCU, precuneus; HP, hippocampus; STG, superior temporal gyrus; SPG, superior parietal gyrus; L, left; R, right.



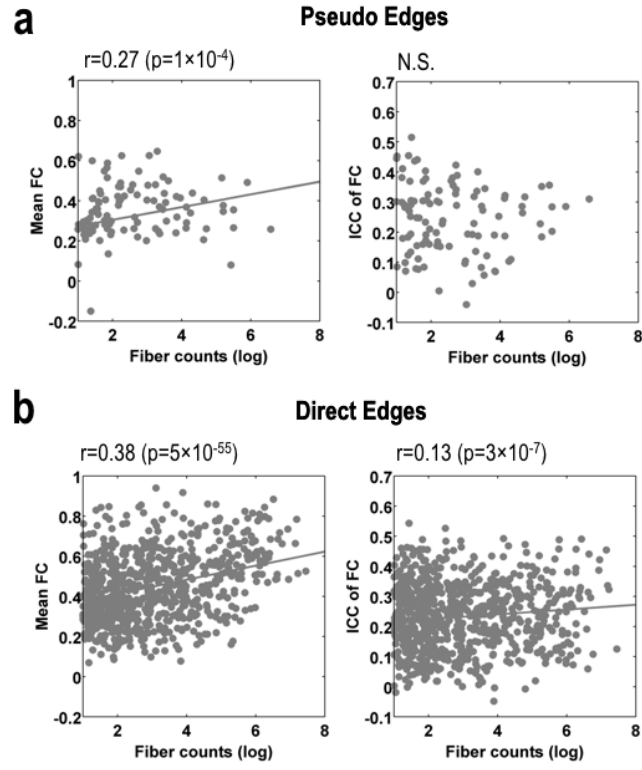

**Figure S9.** The relationships between structural connectivity and mean and stability of pseudo-FC and direct-FC after global signal regression. The relationships between the mean functional connectivity of FC and log-transformed fiber counts (left) and between the stability (ICC) of FC and log-transformed fiber counts (right) for pseudo edges (a) and direct edges (b).

| <b>Regions</b>                             | <b>Abbreviation</b> | <b>Regions</b>                | <b>Abbreviation</b> |
|--------------------------------------------|---------------------|-------------------------------|---------------------|
| Precentral gyrus                           | PrCG                | Lingual gyrus                 | LING                |
| Superior frontal gyrus (dorsolateral part) | SFGdor              | Superior occipital gyrus      | SOG                 |
| Orbitofrontal gyrus (superior part)        | OFGsup              | Middle occipital gyrus        | MOG                 |
| Middle frontal gyrus                       | MFG                 | Inferior occipital gyrus      | IOG                 |
| Orbitofrontal gyrus (middle part)          | OFGmid              | Fusiform gyrus                | FFG                 |
| Inferior frontal gyrus (opercular part)    | IFGop               | Postcentral gyrus             | PoCG                |
| Inferior frontal gyrus (triangular part)   | IFGtr               | Superior parietal gyrus       | SPG                 |
| Orbitofrontal gyrus (inferior part)        | OFGinf              | Inferior parietal lobule      | IPL                 |
| Rolandic operculum                         | ROL                 | Supramarginal gyrus           | SMG                 |
| Supplementary motor area                   | SMA                 | Angular gyrus                 | ANG                 |
| Olfactory cortex                           | OLF                 | Precuneus                     | PRCU                |
| Superior frontal gyrus (medial part)       | SFGmed              | Paracentral lobule            | PCL                 |
| Orbitofrontal gyrus (medial part)          | OFGmed              | Caudate                       | CAU                 |
| Rectus                                     | REC                 | Putamen                       | PUT                 |
| Insula                                     | INS                 | Pallidum                      | PAL                 |
| Anterior cingulate cortex                  | ACC                 | Thalamus                      | THL                 |
| Middle cingulate cortex                    | MCC                 | Heschl gyrus                  | HES                 |
| Posterior cingulate cortex                 | PCC                 | Superior temporal gyrus       | STG                 |
| Hippocampus                                | HP                  | Temporal pole (superior part) | TPsup               |
| Parahippocampal gyrus                      | PHG                 | Middle temporal gyrus         | MTG                 |
| Amygdala                                   | AMYG                | Temporal pole (middle part)   | TPmid               |
| Calcarine                                  | CAL                 | Inferior temporal gyrus       | ITG                 |
| Cuneus                                     | CUN                 |                               |                     |

**Table S1.** Regional abbreviations of brain regions in AAL atlas.
